# Supplementary material
Source: PubMed Central journal article supplement (PMC8752469)
Supplement: NIHMS1753727-supplement-7.pdf [file NIHMS1753727-supplement-7.pdf]

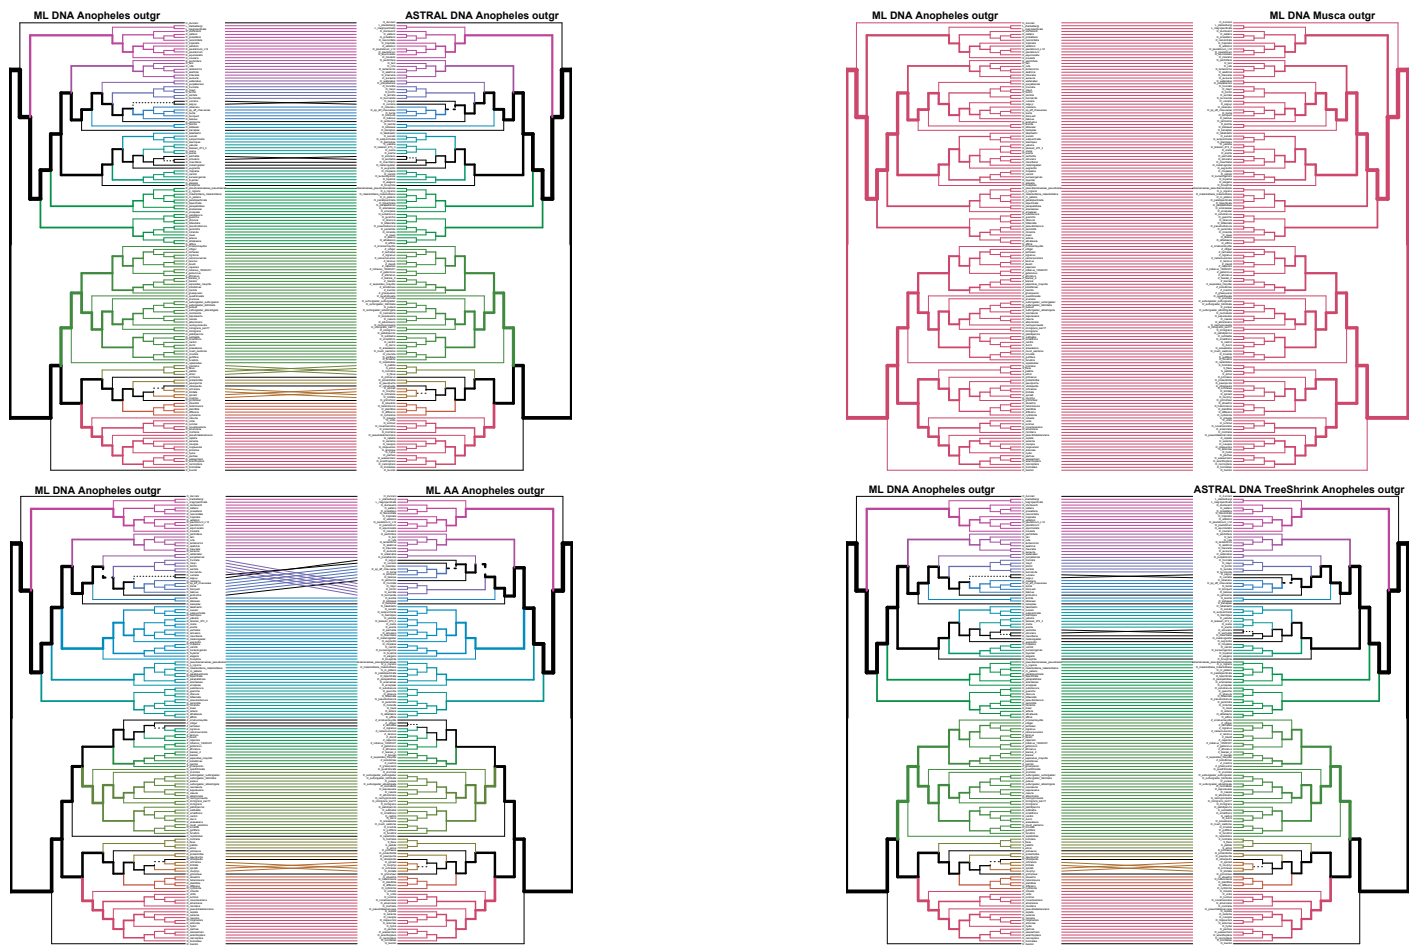

**Figure S1. Topological comparisons between trees inferred by different methods, related to Figure 1. Black paths on the phylogenetic trees lead to dashed branches that indicate topological incongruencies.**

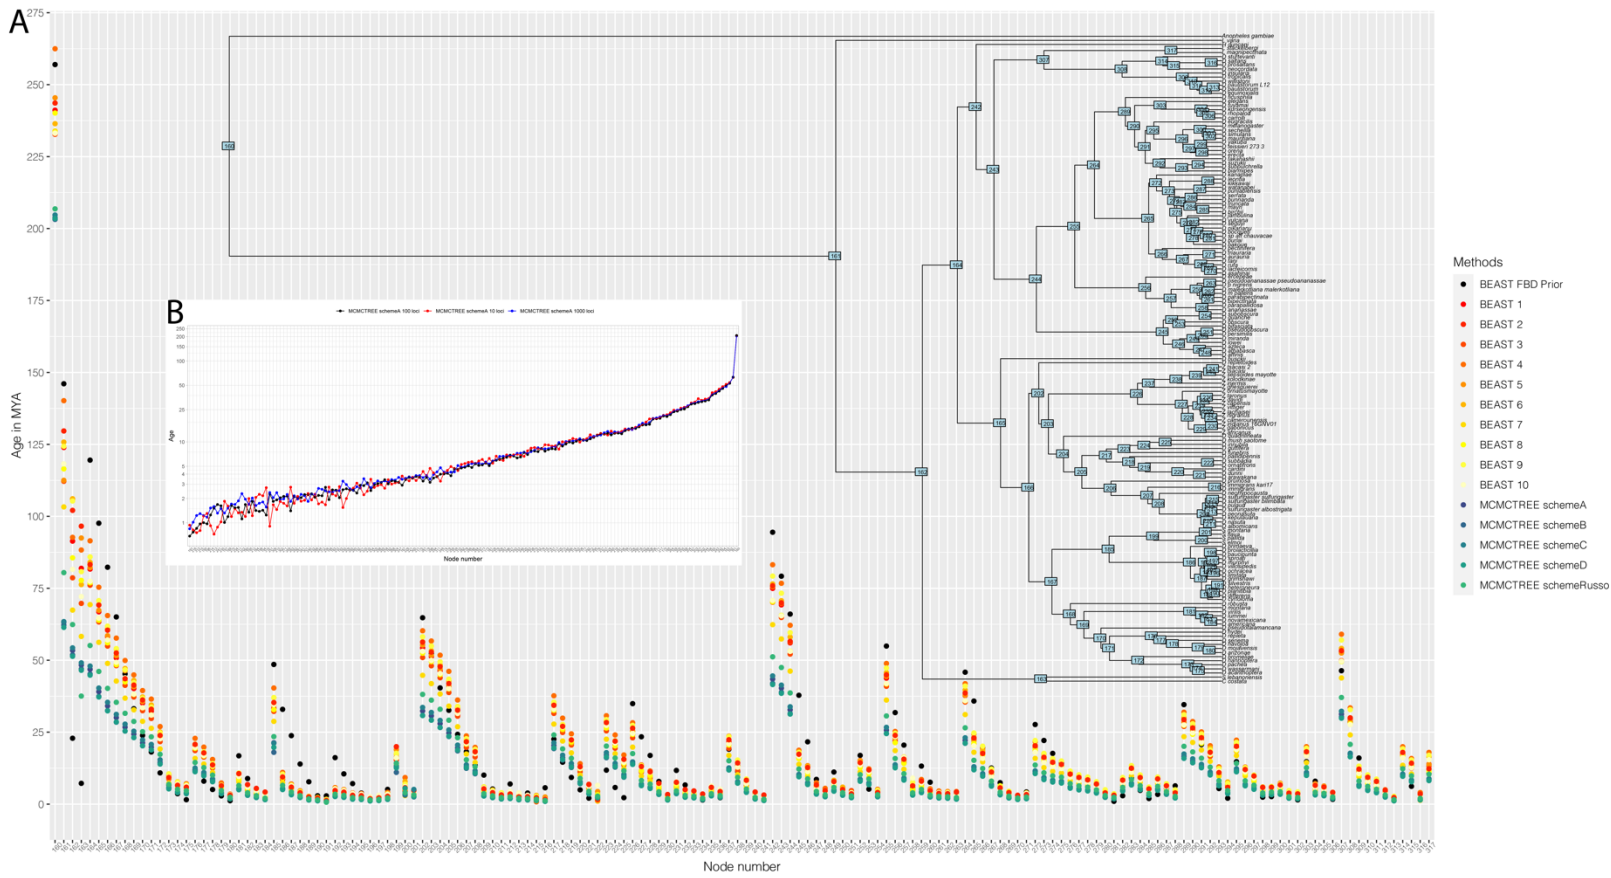

**Figure S2. Divergence time estimation, related to Figure 1.**

(A) Age estimates produced by different calibration schemes and methods.  $x$ -axis indicates node numbers. The  $y$ -axis represents the inferred age in MYA.

(B) Comparison between nodal calibrations based on different numbers of loci using scheme A. Nodes are arranged on the  $x$ -axis according to scheme A from the youngest to the oldest. The  $y$ -axis represents the log of inferred age in MYA.

4

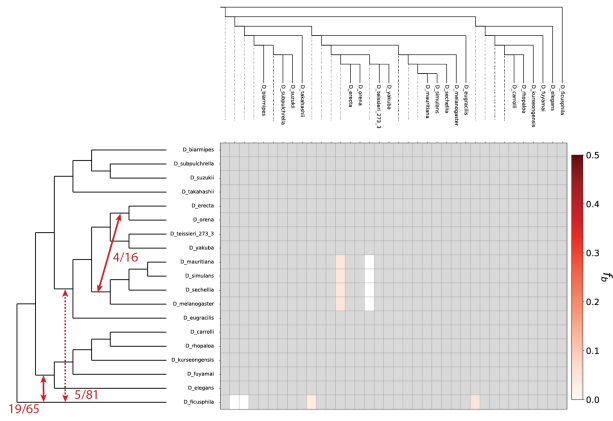

8

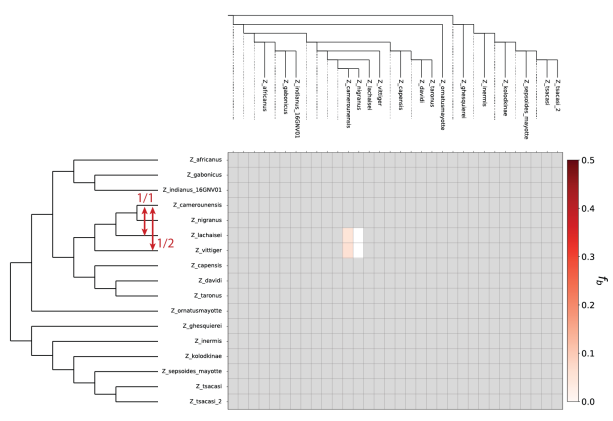

5

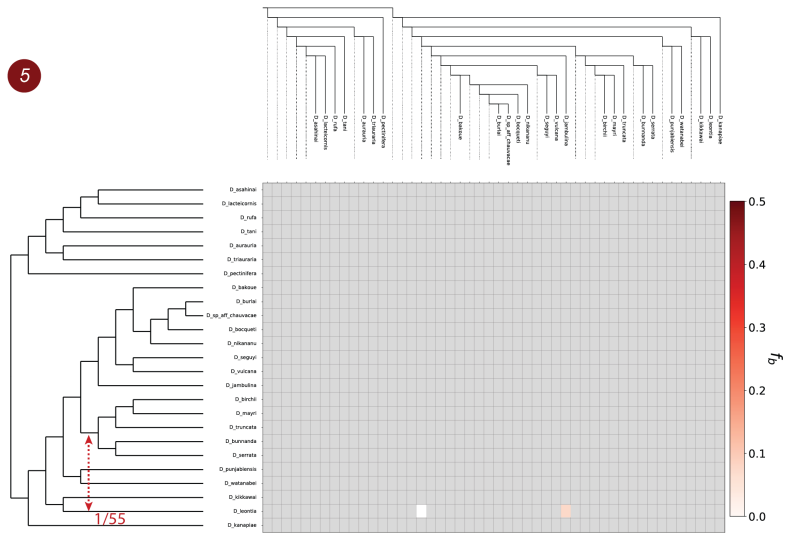

6

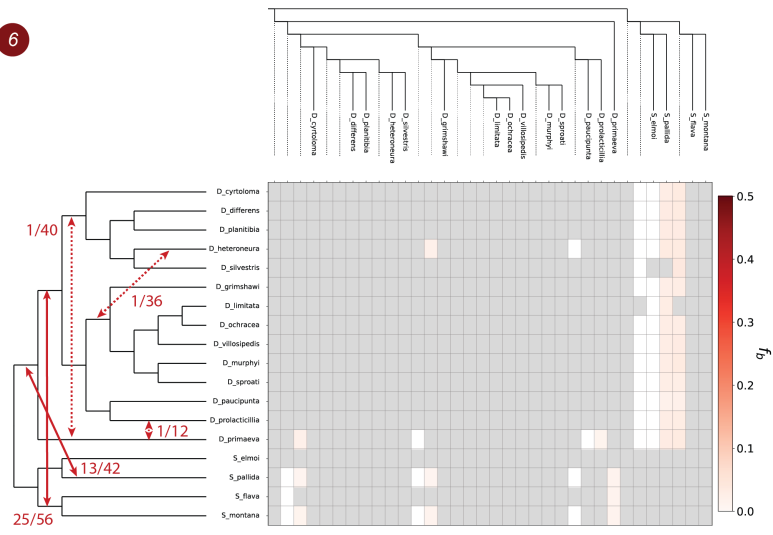

**Figure S3. Patterns of introgression inferred for the monophyletic clades 4–6 and 8, related to Figure 3.** The matrix shows inferred introgression proportions as estimated from gene tree counts for the introgressed species pairs (STAR Methods), and then mapped to internal branches using the  $f$ -branch method. The expanded tree at the top of each matrix shows both terminal and ancestral branches. The tree on the left side of each matrix represents species relationships with mapped introgression events (red arrows) derived from the corresponding  $f$ -branch matrix (STAR Methods). The fractions next to each arrow represent the number of triplets that support a specific introgression event by both DCT and BLT divided by the total number of triplets that could have detected the introgression event. Dashed arrows represent introgression events with low support (triplet support ratio < 10%). Clades 1 and 3 are not shown because no introgression was found in these clades according to the DCT-BLT combined test.

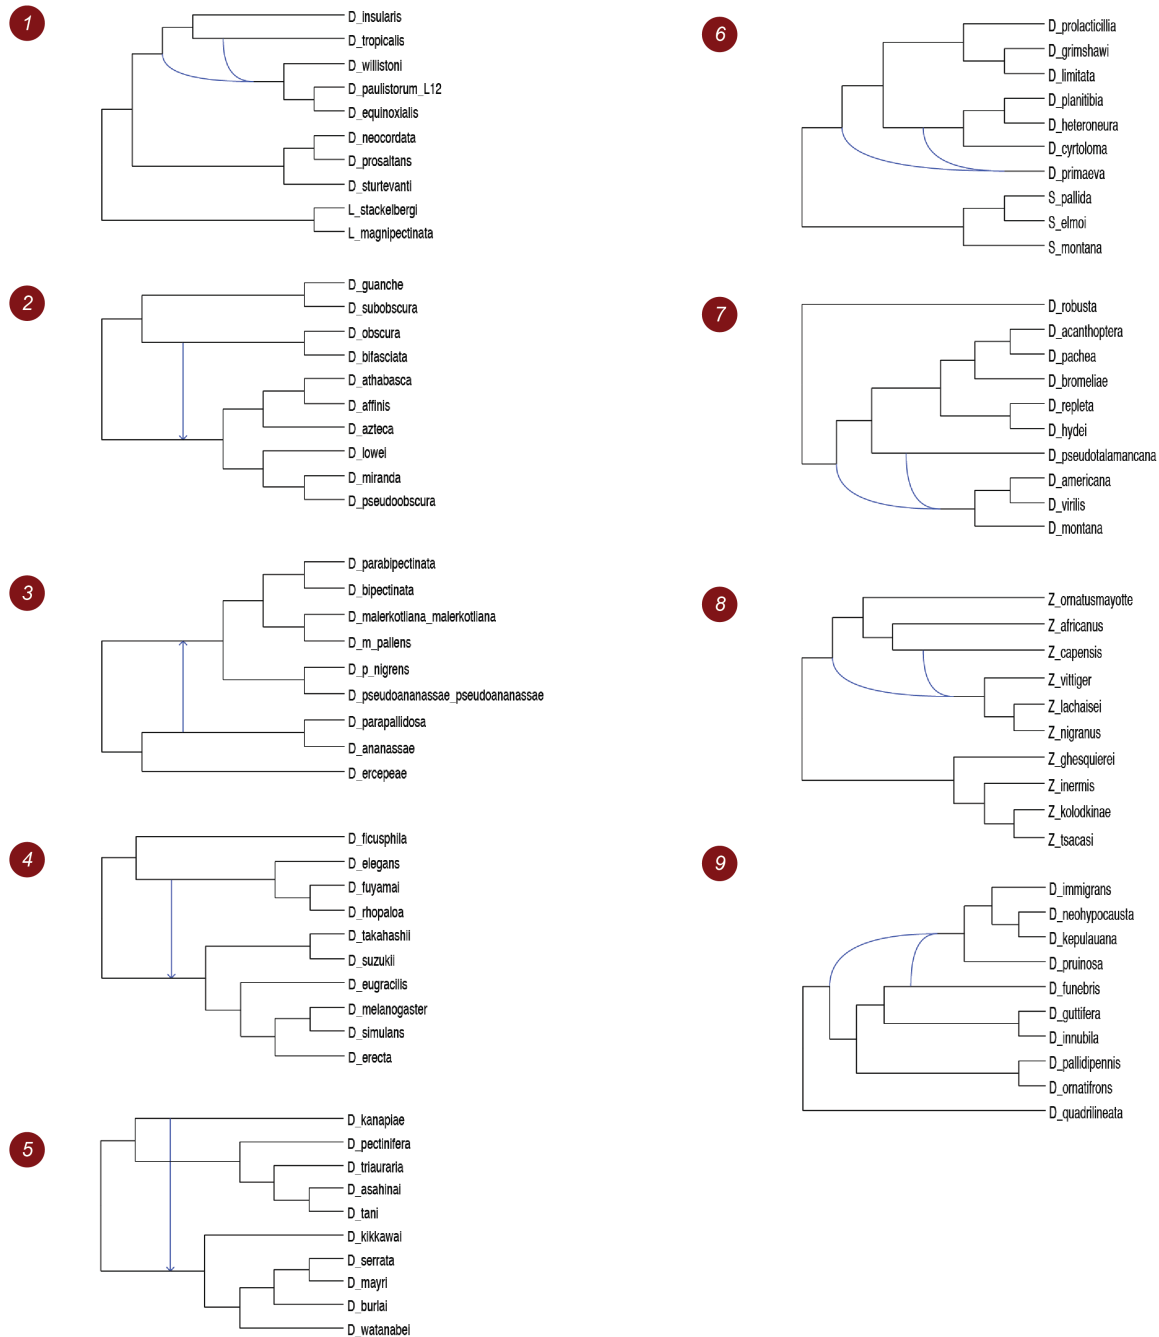

**Figure S4. Patterns of introgression inferred for the monophyletic clades 1–9 using PhyloNet, related to Figure 3.** For each clade we show the topology of the phylogenetic network with the highest likelihood. Blue branches denote reticulations. Note that for all clades except clade 8, the networks with the highest likelihood scores from PhyloNet qualitatively agree with the inferred introgression patterns by the DCT-BLT results summarized by *Dsuite*: the best-supported position of a reticulation event inferred by PhyloNet tended to occur in the same or similar locations on the tree as introgression events we inferred with our DCT-BLT analysis. On the other hand, PhyloNet inferred an introgression event in clade 8 that is more ancient than that inferred by DCT-BLT (an introgression event between *Z. capensis* and the *Z. camerounensis*-*Z. nigranus* ancestor detected by DCT-BLT is pushed back to the *Z. camerounensis*-*Z. vittiger* ancestor by PhyloNet). Uncertainty over the precise history of introgression in clade 8 notwithstanding, PhyloNet is consistent with our DCT-BCT analysis and identifies introgression across the *Drosophila* phylogeny.

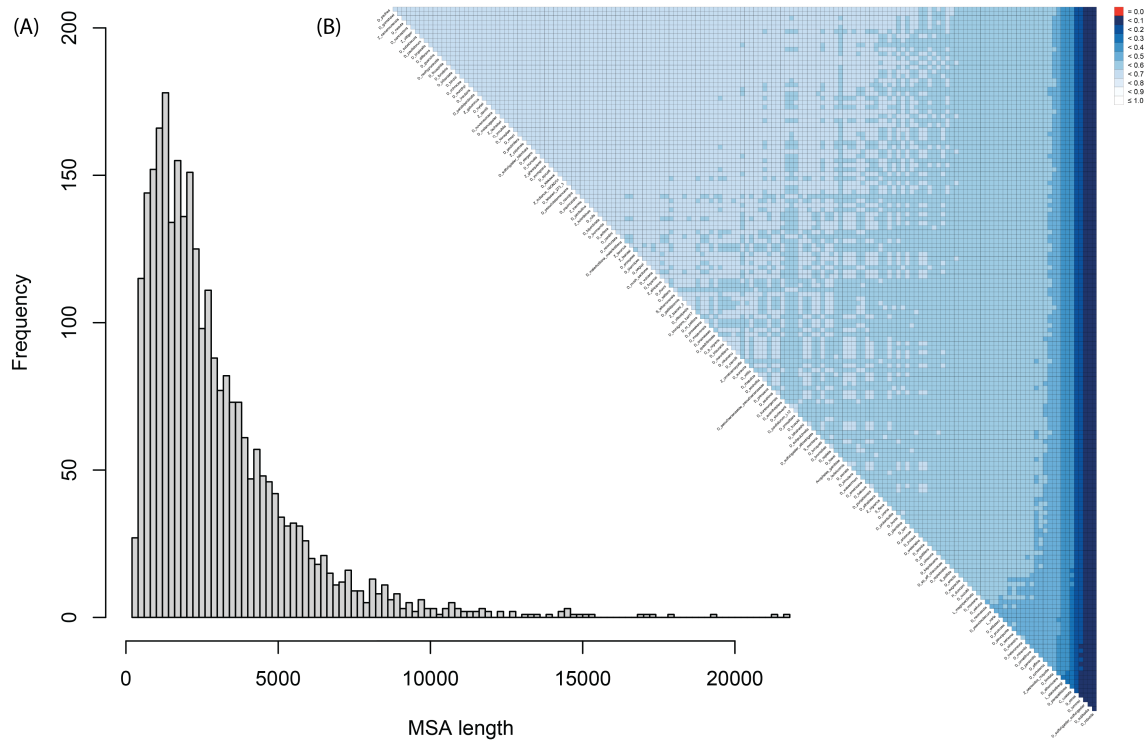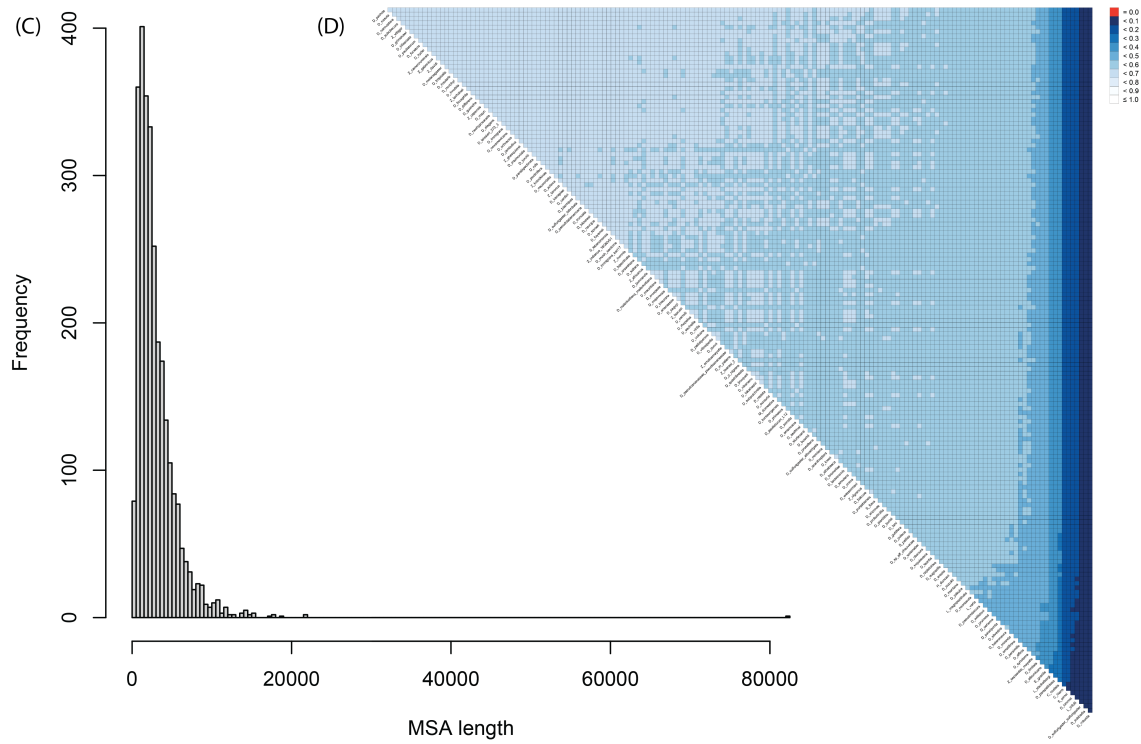

**Figure S5. Supermatrix completeness scores and distribution of BUSCO MSA lengths, related to Figure 1.** Matrices show pairwise completeness metric values computed by AliStat (the fraction of sites for which both sequences have a completely specified character). Larger values indicate higher levels of MSA completeness. MSA length distributions and AliStats matrices were generated for datasets where *Anopheles gambiae* (panels A and B) and *Musca domestica* (panels C and D) were used as outgroups.

|                                           | BLT (%) | DCT (%) | DCT-BLT (%) |
|-------------------------------------------|---------|---------|-------------|
| <b>Excluded alignments &lt; 1000 bp</b>   | 84      | 94      | 80          |
| <b>Consistent Muller element</b>          | 70      | 89      | 76          |
| <i>d<sub>N</sub>/d<sub>S</sub> filter</i> | 69      | 82      | 54          |
| <b>Random subsampling</b>                 | 76      | 85      | 65          |
| <b>TreeShrink</b>                         | 75      | 66      | 52          |

**Table S1. Summary table for the robustness of the introgression analysis results to data quality and evolutionary rate, related to Figure 3.** Percentages indicate how many introgressing pairs of species identified by BLT, DCT and their intersection after applying different filters overlap with the introgression pairs identified without applying them.

Performance evaluation of BLT and DCT analyses on gene trees that excluded alignments with fewer than 1,000 sites (the “Excluded alignments < 1000 bp” row above): A large fraction of introgressing species pairs that were identified by BLT, DCT, and their intersection remained significant after filtering out these short alignments (Data S2).

Impact of rapid karyotype evolution observed in the *obscura* group (clade 2) on introgression inference (“Consistent Muller element”): Loci that did not belong to the same Muller element within all three species examined in a triplet were excluded before repeating our BLT-DCT analysis on clade 2. This filtering scheme had only a minor impact on introgression estimation after filtering out loci that are found on different Muller elements in species within this clade (Data S2). More importantly, this filtering had no impact on the introgression events discussed below and shown in Figure 2—the exact same events were inferred for clade 2.

Effects of evolutionary rate (as measured by  $d_N/d_S$ ) heterogeneity across branches on introgression inference (“ $d_N/d_S$  filter”): For each triplet tested by BLT and DCT, gene trees with  $d_N/d_S > 0.53$  were excluded; this cutoff corresponds to the upper 5% critical value of  $d_N/d_S$  distribution across all the clades and gene trees. Importantly, a large number of genes are removed when applying this filter because only one branch within the portion of the gene tree relevant to the triplet must exceed the critical value of  $d_N/d_S$  to result in the entire gene tree’s removal (Data S2). We therefore asked to what extent this reduced fraction of introgressing taxon pairs is a consequence of reduced power due to the reduction in the number of gene trees (“Random subsampling”). We found that randomly subsampling gene trees without respect to  $d_N/d_S$  value can affect introgression inferences in a similar fashion (see STAR Methods). Although we don’t rule out the possibility that evolutionary rate heterogeneity may influence our DCT-BLT analysis, e.g. 54% of DCT-BLT results is significantly different ( $P < 0.001$ ) from the mean (66%) of distribution of percentages obtained by repeating resampling procedure 1000 times, or that the persistence of introgressed alleles may be correlated with a gene’s evolutionary rate, this result shows that our estimates of gene flow are not being driven primarily by genes evolving under the least amount of selective constraint and/or the greatest amount of positive selection.

Performance of BLT and DCT using a gene tree set with potentially misaligned sequences removed (“TreeShrink”): After using TreeShrink to remove potentially misaligned sequences, we obtained results largely concordant with other methods as shown in Data S2. However, we notice several exceptions: in clades 5 and 7 the number of species pairs with at least one triplet that is significant according to both the DCT and BLT methods is markedly higher after running TreeShrink, largely due to an increase in significant DCT results. Conversely, for Hawaiian drosophilids (clade 6) we no longer observe any overlap between triplets identified by BLT and DCT after filtering via TreeShrink.



| Clade | Introgression Event                                                                         |
|-------|---------------------------------------------------------------------------------------------|
| 2     | <i>D. obscura</i> ... <i>D. bifasciata</i> ↔ <i>D. pseudoobscura</i> ... <i>D. affinis</i>  |
| 4     | <i>D. erecta</i> ... <i>D. orena</i> ↔ <i>D. mauritiana</i> ... <i>D. melanogaster</i>      |
| 4     | <i>D. ficusphila</i> ↔ <i>D. carrolli</i> ... <i>D. elegans</i>                             |
| 7     | <i>D. robusta</i> ↔ <i>D. pseudotalamancana</i>                                             |
| 7     | <i>D. robusta</i> ↔ <i>D. americana</i> ... <i>D. montana</i>                               |
| 7     | <i>D. hydei</i> ↔ <i>D. arizonae</i> ... <i>D. seriema</i>                                  |
| 7     | <i>D. pseudotalamancana</i> ↔ <i>D. americana</i> ... <i>D. montana</i>                     |
| 7     | <i>D. pachea</i> ↔ <i>D. acanthoptera</i>                                                   |
| 7     | <i>D. novamexicana</i> ↔ <i>D. arizonae</i> ... <i>D. hydei</i>                             |
| 7     | <i>D. hydei</i> ↔ <i>D. americana</i> ... <i>D. novamexicana</i>                            |
| 7     | <i>D. americana</i> ... <i>D. novamexicana</i> ↔ <i>D. arizonae</i> ... <i>D. seriema</i>   |
| 9     | <i>D. funebris</i> ... <i>D. mush sãotomé</i> ↔ <i>D. albomicans</i> ... <i>D. pruinosa</i> |
| 9     | <i>D. pruinosa</i> ↔ <i>D. arawakana</i> ... <i>D. mush sãotomé</i>                         |

**Table S2. Introgression scenarios estimated by the stringent version of DCT-BLT approach, related to Figure 3.** Here we applied a more stringent version of the DCT-BLT that compares the branch lengths of the discordant topology with those of the concordant topology and is thus not sensitive to ancestral population structure (Method Details). Of the 511 triplets that were significant according to our combined DCT-BLT test, 144 (28.1%) remain significant when imposing this much more stringent version of the BLT (again, after FDR correction). We then asked how many of the 30 introgression events shown in Figs. 3 and S3 were significant by this more stringent test for at least one triplet, finding that 13 of the 30 events (43.3%) are significant, including 11/17 (64.7%) of the most strongly supported events (those significant in at least 10% of triplets in our original analysis and shown in solid lines in Figs. 3 and S3).

## Supplemental References

S1. Grimaldi, D., and Engel M.S. (2005). *Evolution of the Insects*. Cambridge University Press, New York and Cambridge.

S2. Winkler, I.S., Labandeira, C.C., Wappler, T., Wilf, P. (2010). Distinguishing Agromyzidae (Diptera) Leaf Mines in the Fossil Record: New Taxa from the Paleogene of North America and Germany and Their Evolutionary Implications. *Journal of Paleontology* 84, 935–954.

S3. von Tschirnhaus M., Hoffeins C. (2009). Fossil flies in Baltic amber—Insights in the diversity of Tertiary Acalyptratae (Diptera, Schizophora), with new morphological characters and a key based on 1000 collected inclusions. *Denisia* 26:171.

S4. Grimaldi, D.A. (1987). Amber fossil Drosophilidae (Diptera), with particular reference to the Hispaniolan taxa. *American Museum novitates* ; no. 2880. Amber drosophilids.

S5. Russo, C.A.M., Mello, B., Frazão, A., Voloch, C.M. (2013). Phylogenetic analysis and a time tree for a large drosophilid data set (Diptera: Drosophilidae). *Zoological Journal of the Linnean Society* 169, 765–775
